# Supplementary material for: A millennium of ore mining and smelting in the eastern Harz: a geospatial database spanning from the medieval period to the 20th century
Source: Copernicus journal article supplement (doi:10.5194/egqsj-74-129-2025), 2025-08-21
Supplement: Supplementary file 1 [file egqsj-74-129-2025-supplement.zip]

## Sheet: Read Me
Columns in the table	How to read it
Phase	Indicator at which map this object is shown
ID	Unique ID for a single object or spatial cluster of objects
Name	Name and (=or) alternative name of the object; (=name) = name of the object before the 30-year war
Type (only smelting sites)	Corresponding categories for the symbolisation in the GIS
Location	If possible, ETRS82 UTM32N coordinates are given (X, Y), showing the object's approximate location. Question marks indicate higher uncertainties. These coordinates can be used to reproduce the maps. Further, the reference is given, on which the object's placement is based. For the smelting sites, river kilometres (rkm) and subregion IDs are given to indicate at which point along the Selke River t…
Earliest Evidence	This time information reflects the year or timespan of the first record / hint of the object
Info	Consolidated exploration phases (Mines) and operating phases (Smelting sites)
Sources/Literature	Declaration of the primary sources (Sources) and secondary sources (Literature)

## Sheet: Mines
Phase	ID	Name	Earliest Evidence	Location	X	Y	Info	Ore	Sources	Literature
Phase 1	-	Region around Biwende / Suderholz	12th century	?			Hypothesis that the fluorite deposits of this region are a necessarity for the copper shale smelting in the Mansfeld region.	Flr		Zerjadke 2016
Phase 1	M45	Dorf Anhalt	12th/13th century	Swieder 2022	652254	5725990	Pingen of iron ore pits dated to the 12th or 13th century	Fe		Börner 2009
Phase 1+2	M02	Mining field north of the Auerberg	?	Swieder 2022	638893	5718143		Fe		Swieder 2022
Phase 1+2	M03	Lines of Pingen at the Erfurter Brückholz	?	Swieder 2022	640784	5717549		-		Swieder 2022
Phase 1+2	M04	Mining field northwest of the Kiliansteiche	?	Swieder 2022	638832	5719430		Fe		Swieder 2022
Phase 1+2	M05	Eiserne Zeche	?	Swieder 2022	640907	5718565		Fe		Swieder 2022
Phase 1+2	M28	Mining field Badeholz	?	Swieder 2022	645575	5722534		-		Swieder 2022
Phase 1+2	M33	Mining field Am Hänichen	?	Swieder 2022	644078	5724432		-		Swieder 2022
Phase 1+2	M44	Mining field at the Schwarzen Stamm	?	Swieder 2022	648715	5727421		-		Swieder 2022
Phase 1+2	M45	Mining field at the Pfannenwiese	?	Swieder 2022	652241	5725707		-		Swieder 2022
Phase 1+2	M46	Mining field at the Jungfernköpfen	?	Swieder 2022	651901	5728045		Fe		Swieder 2022
Phase 1+2	M47	MIning pits Ochsentannen	?	Swieder 2022	639264	5725155		-		Swieder 2022
Phase 2	M06	silver mine Reichenberg	1496	Swieder 2022	639217	5722542	1496; record that a silver mine was loaned	Ag		Oelke 2008
Phase 2	M13	Hilfe Gottes (=Hinterer Birnbaumschacht, Vorsichtiger Bergmann)	1563	Swieder 2022	643736	5719704	1563-1581	-		Oelke 2014
Phase 2	M14	Heilige Drei Könige	pre-1539	?	643996	5719628	pre1539-1544, 1569-1572; in phase 3 Friedenszeche	-		Oelke 2014
Phase 2	M18	Fluorite mine Lobig	1537	?	640981	5722260	1537, 1585, 1604	Flr		Oelke 2008
Phase 2	M20	Fluorite mine Suderholz	1430	?	641982	5721952	1430, 1498?, 1508, 1536, 1560, 1575?, 1614; beginning of the 17th century "Kies"; mining site is older	Flr, As, Cu		Oelke 2008, Börner 2009
Phase 2	M21	Silver mine Heidelberg	1438	?	641574	5721462	1438, 1496; record that a silver mine was loaned	Ag		Oelke 2008
Phase 2	M22	Lindenberg	1480?	?	643075	5721587	1480?, 1604	Cu		Oelke 2008
Phase 2	M23	Wolfsberg	1480?	?	644356	5721149	1480?, 1492, 1563, 1597	-		Oelke 2008
Phase 2	M26	Biwende	1430	-	645668	5720638	1430, 1460-1498, ~1520, 1539, 1562/65, 1572/73, 1586, 1612, 1624; 1430-1586 fluorite, 1492 first silver veins discovered; for the early phases no exact location known	Pb, Ag, Flr		Oelke 2008
Phase 2	M32	Rautenkranz	1572	?	643934	5724821	1572/73	Cu
Phase 2	M36	Davidszeche	1569?	?, GK25	647258	5724149	1569/90, 1610	-		Oelke 2008
Phase 2	M37	Ehrigsburg/Erichsburg	?	Swieder 2022	642563	5726485	No records, but very likely	Cu		Oelke 2008
Phase 2	M38	Großer Mühlberg	1603	?	643453	5726324	1603	Cu		Oelke 2008
Phase 2	M40	Ritzberg	1478	?	645016	5725796	1478, 1758, 1802-1804, 1807; silver, copper, lead, tin	Fe		Oelke 2008
Phase 2	M41	Kaiser Heinrich	1571	?, Oelke 2014	647559	5724712	1571	-		Oelke 2014
Phase 2	M41	Glücksrad	1570?	?, Oelke 2014			1570?, 1580-1581	-		Oelke 2014
Phase 2	M41	St. Jürgen	1539	?, Oelke 2014	647662	5724732	1539, 1563, 1571-1576, 1580-1581	-		Oelke 2014
Phase 2	M41	1. u. 2. Maß	1571	?, Oelke 2014	647775	5724745	1571	-		Oelke 2014
Phase 2	M43	St. Michael	1539	?, Oelke 2008	647369	5725536	1539-?;	Pb, Ag, Fe		Oelke 2008
Phase 2+3	M14	Beständige Freundschaft (=Heiliges Kreuz/Birnbaum)	1300	?	644347	5719558	1300, 1415, 1475?, 1490, pre1536-1544, 1560, 1563, 1572-1579, 1692-1698, 1714-1724, 1726-1740, 1746-1764	Pb, Ag		Oelke 1973, Oelke 2014, Ließmann 2010
Phase 2+3	M15	Glücksstern (=Kalbsauge)	1436	Swieder 2022, GK25	644856	5719553	1436/42, 1475?, 1490/97, 1692-1698, 1719-1724, 1726-1740, 1742-1753, 1826-1863, 1915-1918, 1915 to 1918 for Wolframit	Pb, Ag, Flr, (W)		Oelke 1973, Oelke 2014, Ließmann 2010
Phase 2+3	M29	Albertine (=Saurgrube)	1567	Swieder 2022, GK25	647762	5722349	1567-1587, 1603-~1625, 1646-1655, 1692-1713, 1719-1740, 1822-1850, 1891-1892; older mining acitivities likely; one of the most high-yield mines between 1690-1728	Pb, Ag		Oelke 1973, Oelke 2008, Stedingk u.a. 2016, Swieder 2021/2022
Phase 2+3	M35	Silberbrunn (=Schwarze Jakob)	1570	-	646760	5724182	1570-1613, 1692-1725	Ag		Oelke 1973, Oelke 2008
Phase 2+3	M36	Vereinigte Gruben (=Heilige Grube)	pre1579	?, GK25	647286	5724179	pre1579?, 1586/90, 1608/11, 1617, 1692-1705, 1706-1718, 1719-1725, 1751-1752, 1809	-		Oelke 1973, Oelke 2008
Phase 2+3	M41	Anna Dorothea (=Gottesgabe)	1536	?, Oelke 2014	647608	5724545	1536, 1563, 1571-1573, 1580, 1585-1590, 1692-1693	Pb, Ag		Oelke 1973, Oelke 2014
Phase 2+3	M41	Weißes Roß (=4. u. 5. Untermaße)	1569	?, Oelke 2014	647590	5724628	1569-1580, 1692-1695, 1711-1714; 1. Lichtloch of the Katharinenstollen	Pb, Ag		Oelke 1973, Oelke 2014
Phase 2+3	M42	Hoffnung Gottes (=2. u. 3. Untermaße)	1560	?, Oelke 2014	648065	5724319	1560-1611, 1614-1617, 1692-1695, 1711-1714	Pb, Ag		Oelke 1973, Oelke 2014
Phase 2+3	M42	Eleonora Dorothea (=Heilige Dreifaltigkeitsfundgrube)	1567	?, Oelke 2014	648130	5724322	1567-1581, 1692-1695	Pb, Ag		Oelke 1973, Oelke 2014
Phase 2+3	M42	Adler (=St. Lorenz)	1570	?, Oelke 2014	648187	5724401	1570-1581, 1692-1695	Pb, Ag		Oelke 1973, Oelke 2014
Phase 2+3	M42	Haus Anhalt (=2. u. 3. Obermaß)	1567	?, Oelke 2014	648315	5724323	1567-1590, 1692-1695, 1711-1714, 1716-1736, 1847-1887	Pb, Ag		Oelke 1973, Oelke 2014
Phase 3	M01	Grube Anna bei Breitenstein	-	Swieder 2022	637345	5719179	most important mine in the Stolberg region for iron bogs	Fe		Swieder 2022
Phase 3	M05	Pfennigsthuner Zug (?)	1776	Swieder 2022	640529	5719108	1776-1874	Fe, Pb, Ag		Swieder 2022
Phase 3	M05	Heiligenberger Zug	1776	Swieder 2022	641233	5719055	1776-1874	Fe, Pb, Ag		Swieder 2022
Phase 3	M07	Gieseckengrube	1692	Swieder 2022	639786	5721794	1692-1696, 1717-1719, 1744-1745, 1778-1784, 1790-1795	Pb, Ag, Flr, Py		Oelke 1973, Ließmann 2010
Phase 3	M08	Grube Agezucht	1755	Swieder 2022	639041	5721568	1755-1761, 1789-1791; earlier mining activities are likely	Pb, Ag		Oelke 1973, Ließmann 2010
Phase 3	M09	Frohe Zukunft am Ampenberg	1714	Swieder 2022	639651	5721269	1714-1720, 1835-1860	Pb, Ag		Ließmann 2010
Phase 3	M10	Bachschacht am Ampenberg	1738	Swieder 2022	640267	5720693	1738-1760	Pb, Ag		Ließmann 2010
Phase 3	M11	Rödelbachschacht am Ampenberg	1956	Swieder 2022	640777	5720308	1956-1958	Flr		Ließmann 2010
Phase 3	M12	Glasebach Grube	?	Bartels 2008	642750	5719859	~1745	Pb, Ag		Ließmann 2010
Phase 3	M12	Neuhaus-Stollberg	-	Swieder 2022	641064	5720211	~1690-1700, ~1849	Pb, Ag		Ließmann 2010
Phase 3	M12	Pfenningsthurm	?	Bartels 2008	641948	5719068	18th century	Pb, Ag		Ließmann 2010
Phase 3	M12	Grube am Stadtweg	1762	Bartels 2008	641897	5719624	1762-1781	Pb, Ag		Oelke 1978, Ließmann 2010
Phase 3	M12	Grube am Haynschen Weg	1788	Bartels 2008	642276	5719242	1788-1811	Pb, Ag		Oelke 1978, Ließmann 2010
Phase 3	M12	Schwarzer Hirsch	1712	Bartels 2008	642256	5719887	1712-1752; in the early 18th century one of the most important mines	Pb, Ag		Oelke 1978, Ließmann 2010
Phase 3	M12	Grube Friedrich	1858	Bartels 2008	641269	5720591	1858-1876	-		Bartels 2008
Phase 3	M12	Teufelsgrube	-	Bartels 2008	641474	5720390	1712-1744	Pb, Ag, Cu		Bartels 2008
Phase 3	M12	Neubeschert Glück	1745	Ließmann 1997	641673	5720200	1745-1758	Cu, Pb, Ag, Zn		Oelke 1978, Ließmann 2010
Phase 3	M12	Maria Anna	1690	Ließmann 1997	641330	5720064	1690-?	Pb, Ag		Oelke 1978, Ließmann 2010
Phase 3	M12	Getreuer Bergmann	1691	Swieder 2022	641967	5720168	1691-1705, 1729-1776, 1810-1856, 1952-1956, 1969-1982; since 1810 only Flr, before that Ag and Flr	Pb, Ag, Cu, Flr		Oelke 1978, Ließmann 2010
Phase 3	M12	Hauptschacht	1691	Swieder 2022	642093	5720413	1691-1765, 1848-1864; pre 1691?; one of the most important silver mines in the first operation period	Pb, Ag, Fe		Oelke 1978
Phase 3	M12	Glückauf	1696	Swieder 2022	642060	5720106	1696-1704, 1712-1749, 1768-?; since 1768 Flr	Pb, Ag, Flr		Oelke 1978
Phase 3	M13	Vorsichtiger Bergmann	-	Swieder 2022	643736	5719704	?	-		Oelke 1973
Phase 3	M13	Gottesgabe (Hinterer Birnbaum)	1692	Swieder 2022, GK25	643586	5719688	1692-?, 1710-?, 1750-1753, 1757-1762, 1826-1863, 1918-1919	Pb, Ag, Flr		Oelke 1973, Ließmann 2010
Phase 3	M14	Vorderer Birnbaumschacht	-	Swieder 2022	644190	5719580	1746-1863	Pb, Ag		Ließmann 2010
Phase 3	M14	Gottesglücker Kunstschacht	-	Swieder 2022	644045	5719582	?	-		Swieder 2022
Phase 3	M14	Fürstenschacht	-	Swieder 2022	644184	5719495	?	-		Swieder 2022
Phase 3	M14	Treibschacht	1746	Swieder 2022, GK25	644213	5719649	1746-1863	Pb, Ag		Ließmann 2010
Phase 3	M16	Grube Anna bei Güntersberge	?	Swieder 2022	637997	5723763	Beginning of the 20th century	Flr		Ließmann 2010
Phase 3	M17	Schacht am Hirschbüchenkopf	1924	Swieder 2022	640129	5722595	~1924, ~1970 exploration	Flr, Fe		Ließmann 2010
Phase 3	M19	Wolframschacht Siptenfelde	1950	Swieder 2022	641714	5722281	1950-1955; Part of the mine Heidelberg und Fluor	W		Ließmann 2010, Swieder 2021/2022
Phase 3	M20	Fluorschacht	1818	GK25	642000	5721719	1818-1835, 1860-1990;	Flr, Py		Oelke 1973, Oelke 2014, Ließmann 2010
Phase 3	M20	Herzogschacht/Grube Heidelberg	1710	Swieder 2022	641853	5721856	1710, 1730, 1787-1835, 1857-1990	Flr		Oelke 1973, Oelke 2002, Ließmann 2010
Phase 3	M23	Kiesschacht am Wolfsberg	1788	Swieder 2022	644474	5721100	1788-1850	Py, Flr		Oelke 1973, Ließmann 2010
Phase 3	M24	Glanschacht	1837	Swieder 2022	644738	5721011	1837-~1860	Pb, Ag, Py		Oelke 1973, Ließmann 2010, Swieder 2021/2022
Phase 3	M25	Fürst Victor Amadeus	1692	GK25	644895	5721025	1692-1699, 1784-1797, ~1860	Pb, Ag		Oelke 1973, Ließmann 2010
Phase 3	M25	Sieben Brüder	1692	Swieder 2022	645032	5720898	1692-1699	-		Oelke 1973
Phase 3	M26	Hasenschacht	-	Swieder 2022	645925	5720496	?	Pb, Ag		Ließmann 2010
Phase 3	M26	Biwender Schacht	1746	Swieder 2022	645283	5720797	1746-1753, 1846-1853	Pb, Ag, Flr		Oelke 1973, Ließmann 2010, Swieder 2021/2022
Phase 3	M27	Grube Pollux	1754	Swieder 2022	645193	5721728	1754-1858	Fe		Oelke 1973, Ließmann 2010
Phase 3	M27	Grube Castor	-	?, GK25	645309	5722055	1754-1858	Fe		Ließmann 2010
Phase 3	M29	Dorothea Jeanette	1692	?	647555	5722396	1692-1712	Pb, Ag		Oelke 1973, Ließmann 2010
Phase 3	M30	Hanichen Schacht	-	?	645426	5723491	?	Pb, Ag		Ließmann 2010
Phase 3	M31	Brachmannsberg	1780	Swieder 2022	642899	5724631	1780-1790, 1979-1990	Flr		Oelke 1973, Ließmann 2010
Phase 3	M32	Rautenkranz	1724	?	643934	5724821	1724-1726 (silver ores), 1757-1759	Pb, Ag, Cu, Flr, Py		Ließmann 2010
Phase 3	M34	Karlschacht auf dem Davidgang	?	Swieder 2022	645548	5724014	18th/19th century	Fe		Ließmann 2010
Phase 3	M39	Grube am (Großen) Brettenberg	1724	Swieder 2022	644891	5726622	pre1724-1802	Cu, As, Py, Flr		Swieder 2022
Phase 3	M41	Tabea	1692	?, Oelke 2014	647352	5724694	1692-1695	-		Oelke 1973

## Sheet: Smelting Sites
Phase	ID	Name	Type	Earliest Evidence	Location	X	Y	rkm	Subregion	Info	Sources	Literature
Phase 1	S2	Charcoal Agezucht	Charcoal pieces	7th/8th century	?, Dobler 1999	640153	5721770	-	A3	C14-age 638-788 cal CE; in70cm depth	Dobler 1999	Dobler 1999
Phase 1	S1	Slag Selkenfelde	Slag pieces	10th to 12th century	?	632581	5724025	0.4	A1	Pieces of slag adjacent to the abandoned village of Selkenfelde		Börner 2009
Phase 1	S4	Slag Agezucht	Slag pieces	-	OA Stolberg Fst.20	638905	5721296	10.2	A3	Slag finds southwest of the Agezucht at the Ampenberg linked to smelting sites	OA Stolberg Fst.20
Phase 1	S9	Birnbaumer Hütten	Silver smeltiing	pre-1300?	?	644138	5719787	16.1	A5	Local smelting activities directly at the earliest Harzgerode mines via bloomeries?		Börner 2009
Phase 1	S10	Slag Hänichen	Slag pieces	-	Swieder 2021	644621	5723739	20.1	B1	Slag finds linked to the abandoned village Hänichen		Swieder 2021
Phase 1	S11	Slag Conrod	Slag pieces	12th/13th century	Swieder 2021	644889	5724296	20.5	B1	Slag finds linked to the abandoned village Conrod		Swieder 2021
Phase 1	S6	Slag Dorf Anhalt	Slag pieces	11th century?	?	652177	5726047	31.3	C1	Pieces of slag and bloomeries adjacent to the village of Anhalt		Bartrow et al. 2021
Phase 1+2	S5	Pieces of lead slags	Slag pieces	?	OA Straßberg Fst.6	640263	5721451	10.9	A3	Location is uncertain. Here, it is placed at the settlement Günterberge	OA Straßberg Fst.6
Phase 1+2	S6	Smelting site Oberer Kiliansteich	Iron smelting	?	Alper et al. in prep.	638943	5719322	12.8	A4	medieval smelting site for iron smelting		Alper et al. in prep.
Phase 1+2	S7	Slag pieces Auerberg	Slag pieces	?	OA Stolberg Fst.16	639466	5717875	12.8	A4	iron slags north of the Auerberg and upsztream of the Frankenteich	OA Stolberg Fst.16
Phase 1+2	S8	Slag pieces	Slag pieces	?	OA Straßberg Fst.5	641732	5719051	13.8	A4	slag finds indicative for smelting activities	OA Straßberg Fst.5
Phase 1+2	S3	Smelting site Gräfingrund	Iron smelting	?	OA Stolberg Fst.19	637537	5720636	5.3	A1	medieval smelting site for iron smelting	OA Stolberg Fst.19	Alper et al. in prep.
Phase 2	S12	Werk bei Güntersberge	Iron smelting	1498	?	637273	5723358	6.6	A1	location is not known for sure, at the settlement Günterberge or in the political region?		Börner 2009
Phase 2	S13	Gräfliche Hütte Straßberg	Silver smelting	1462	Ließmann 2010	641944	5720504	13	A5	1462-1580		Börner 2009
Phase 2	S14	Bärlochsmühle Straßberg	Silver smelting	1467	Mtbl. 1872	642470	5720636	13.7	A5	1467 - at least 1539	Mtbl. 1872	Oelke 2007
Phase 2	S15	Birnbaumhütte	Silver smelting	1539	Oelke 2007	643781	5720889	16.1	A5	1539-1739		Oelke 2007
Phase 2	S16	Schmelzhütte Rinkemühle	Silver smelting	1400	Oelke 2007	644095	5721426	16.4	A5	1400-1518		Oelke 2007
Phase 2	S17	Hoppenstiegshütte	Silver smelting	1430	Oelke 2014	645059	5722729	18.5	B1	1430-?		Oelke 2014
Phase 2	S18	Schwefelhütte	Vitriol and sulphur industry	1530	Oelke 2007	646532	5724233	21.1	B1	1530-1546; 1570-1590/1608		Oelke 2007
Phase 2	S19	Neue (alte) Hütte	Silver smelting	1563	Oelke 2007	646827	5724849	22.3	B3	1563-1608; 1611-1621 (sporadically works)		Oelke 2007
Phase 2	S19	Pochwerk	Pounding / stamp mill	1563?	Oelke 2007	646897	5724811	22.3	B3			Oelke 2007
Phase 2	S20	Pochwerk unterm oberen Karlsteich	Pounding / stamp mill	1500	?	646876	5725328	23.1	B3	1500-1608		Dobler 1999
Phase 2	S21	Alte Hütte	Silver smelting	1539?	Oelke 2007	646979	5725764	23.9	B3	1539-1547		Oelke 2007
Phase 2	S22	Niederste Hütte	Silver/Copper smelting	1430/1468?	Oelke 2007	652030	5726876	31.8	C1	1430-1492		Oelke 2007; Börner 2009
Phase 2	S22	Kupferhammer	Copper smelting	1311	?, Oelke 2007	652030	5726876	31.8	C1			Börner 2009
Phase 3	S23	Schwefelholzwerk	Other	-	Mtbl. 1872	637702	5723445	7	A1		Mtbl. 1872
Phase 3	S24	Agezucht-Pochwerk	Pounding / stamp mill	1760	?	639447	5721735	10.1	A3	1760-1795		Dobler 1999
Phase 3	S25	Chemische Fabrik Fluor	Vitriol and sulphur industry	1888	GK25	640727	5721465	11.2	A3	1888-1927		Dobler 1999
Phase 3	S26	Straßberger Oberhütte?	Silver smelting	1700	?	641050	5720301	12.8	A4	1700-1730; small smelting site as part of the Neuhaus-Stolberg mine discussed in Oelke 1978		Oelke 1978, Dobler 1999
Phase 3	S27	Rödelbachpochwerk	Pounding / stamp mill	1717	?	641536	5720502	12.8	A4	1717-1765		Dobler 1999
Phase 3	S13	Straßberger Pochwerke	Pounding / stamp mill	1712	Ließmann 2010	641967	5720492	13	A5	1712-1806		Bartels 2008, Ließmann 2010
Phase 3	S13	Straßberger Unterhütte	Silver smelting	1722	Ließmann 2010	641944	5720504	13	A5	1722-1805		Bartels 2008, Börner 2009
Phase 3	S28	Selkepochwerk	Pounding / stamp mill	1693	GK25	643118	5721034	14.6	A5	1693-1905		Dobler 1999
Phase 3	S29	Birnbaumpochwerk	Pounding / stamp mill	1736	?	643816	5720901	16.1	A5	1736-1780		Dobler 1999
Phase 3	S30	Pochwerk unterm Fürstenteich	Pounding / stamp mill	1729	?	644938	5721658	17.3	B1	1729-1910
Phase 3	S31	(Fürst-Victor-Friedrich) Silberhütte	Silver smelting	1693	GK25	644775	5721902	17.3	B1	1693-17??, 1724-1909		Börner 2009
Phase 3	S31	Virtiol- und Schwefelwerk Silberhütte	Vitriol and sulphur industry	1693	GK25	644775	5721902	17.3	B1	1693-17??, 1800-1909		Börner 2009
Phase 3	S31	Pottaschenhütte Silberhütte	Other	1668	GK25	644775	5721902	17.3	B1	1668-1692		Dobler 1999
Phase 3	S31	Pochwerk Silberhütte	Pounding / stamp mill	-	?	644758	5721805	17.3	B1			Börner 2009
Phase 3	S32	Pulvermühle Silberhütte (Sielbermühle??)	Vitriol and sulphur industry	1608	GK25	645208	5722279	18	B1	1608-1700		Börner 2009
Phase 3	S33	Pulvermühle/ Pyrotechnik Silberhütte	Vitriol and sulphur industry	1700	-	645065	5722544	18	B1	1700-1990		Börner 2009
Phase 3	S34	Erichsburger Hütte	Silver smelting	1710	?	642679	5726429	21.9	B2	1710-1742		Börner 2009
Phase 3	S34	Erichsburger Pochwerk	Pounding / stamp mill	1710	?	642679	5726429	21.9	B2	1710-1742		Börner 2009
Phase 3	S35	Mühlberg Pochwerk	Pounding / stamp mill	1710	?	643459	5726069	21.9	B2	1710-1742		Börner 2009
Phase 3	S35	Mühlberg Hütte	Silver smelting	1710	?	643459	5726069	21.9	B2	1710-1742		Börner 2009
Phase 3	S36	Neues Werk	Iron processing	1769	GK25	646982	5725774	23.9	B3	1769-1840; since 1787 extended by the iron processing site named Drahtzug		Reichmann 2001
Phase 3	S37	Stahlhammer	Iron processing	1782	Gk25	647312	5725846	24.4	B3	1782-1896		Reichmann 2001
Phase 3	S38	Mägdesprunger Eisenhütte	Iron smelting	1646	Gk25	647307	5726430	25.4	B3	1646-1708 (Iron); 1710-1729 (silver); 1757-1876; 1876-1990		Reichmann 2001
Phase 3	S38	Mägdesprunger Eisenhütte	Pounding / stamp mill	1646	Gk25	647307	5726430	25.4	B3	1646-1708 (Iron); 1710-1729 (silver);		Reichmann 2001
Phase 3	S38	Mägdesprunger Eisenhütte	Iron processing	1646	Gk25	647307	5726430	25.4	B3	1646-1708 (Iron); 1710-1729 (silver); 1757-1876; 1876-1990		Reichmann 2001
Phase 3	S39	Carlswerk	Iron processing	1800	Gk25	647528	5726298	25.8	B3	1800-1842		Reichmann 2001
Phase 3	S40	I. Friedrichshammer	Iron processing	1777	Gk25	647788	5726233	26.1	B3	1777-1883		Reichmann 2001
Phase 3	S41	II. Friedrichshammer	Iron processing	1777	Gk25	648289	5726099	26.7	B3	1777-1883		Reichmann 2001
Phase 3	S42	III. Friedrichshammer	Iron processing	1782	Gk25	648517	5726139	27	B3	1782-1861		Reichmann 2001
Phase 3	S43	IV. Friedrichshammer	Iron processing	1786	Gk25	649781	5726375	28.8	C1	1786-1861		Reichmann 2001
Phase 3	S44	Nagelschmiede	Iron processing	-	?	650396	5727136	30	C1
