# Supplementary material for: A millennium of ore mining and smelting in the eastern Harz: a geospatial database spanning from the medieval period to the 20th century
Source: Copernicus journal article supplement (doi:10.5194/egqsj-74-129-2025), 2025-08-21
Supplement: Supplementary file 1 [file egqsj-74-129-2025-supplement.zip]

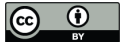

*Supplement of*

**A millennium of ore mining and smelting in the eastern Harz: a geospatial database spanning from the medieval period to the 20th century**

**Johannes Keßels et al.**

*Correspondence to:* Johannes Keßels ([johannes.kessels@geo.rwth-aachen.de](mailto:johannes.kessels@geo.rwth-aachen.de))

- [egqsj-74-129-2025-supplement-title-page.pdf](#)
- Supplement
  - [Supplement 1.xlsx](#)

The copyright of individual parts of the supplement might differ from the article licence.
